# Supplementary material for: Impact of Outpatient Rehabilitation Service in Preventing the Deterioration of the Care-Needs Level Among Japanese Older Adults Availing Long-Term Care Insurance: A Propensity Score Matched Retrospective Study
Source: MDPI journal article supplement (doi:10.3390/ijerph16071292), 2019-04-10
Supplement: s1 [file s1]

Supplementary Table S1. Degree of independent daily living for disabled older adults

---

|        |                                                                                                                 |
|--------|-----------------------------------------------------------------------------------------------------------------|
| Rank J | Although the patient has some disability, they are independent in their daily life and can go out on their own. |
|        | 1. The patients can go out by using public transportation.                                                      |
|        | 2. The patient can go out in the neighborhood.                                                                  |
| Rank A | The patients can live almost independently at home, but they cannot go out without caregiver.                   |
|        | 1. The patient goes out with assistance and mostly stays away from the bed during the daytime.                  |
|        | 2. The patient seldom goes out, and they remain sleeping or waking up during the daytime.                       |
| Rank B | The patient requires some care at home and mainly stays on the bed during the daytime.                          |
|        | 1. The patient can transfer to the wheelchair and eat and excrete away from the bed.                            |
|        | 2. The patient can transfers to the wheelchair with assistance.                                                 |
| Rank C | The patient is bedridden and requires assistance with excretion, eating, and dressing.                          |
|        | 1. The patient can roll over.                                                                                   |
|        | 2. The patient cannot roll over.                                                                                |

---

Ministry of Health, Labor and Welfare. Textbook for expert investigators concerning a certification of needed long-term care, revised edition; Ministry of Health, Labour and Welfare: Tokyo, Japan, 2009. Available online: <https://www.mhlw.go.jp/file/06-Seisakujouhou-12300000-Roukenkyoku/0000077237.pdf>. [in Japanese] (Accessed on 23 March 2019).

Supplementary Table S2. Degree of independent daily living for older adults with dementia

| Rank | Criteria                                                                                                                                                          | Examples of observed symptoms or behaviors                                                                                                                                                                                                                                                 |
|------|-------------------------------------------------------------------------------------------------------------------------------------------------------------------|--------------------------------------------------------------------------------------------------------------------------------------------------------------------------------------------------------------------------------------------------------------------------------------------|
| 0    | Independent                                                                                                                                                       |                                                                                                                                                                                                                                                                                            |
| I    | The patient has some dementia, but can live almost fully independently at home and in society.                                                                    |                                                                                                                                                                                                                                                                                            |
| II   | Although the patient has some symptoms or behaviors disturbing their daily living, they can live independently by with the attention and support of others.       |                                                                                                                                                                                                                                                                                            |
| IIa  | The condition in II is also observed outside the home.                                                                                                            | Frequently gets lost on the streets or makes noticeable mistakes in matters that the person was previously able to handle, such as shopping, clerical work, or financial management.                                                                                                       |
| IIb  | The condition in II is also observed at home.                                                                                                                     | Being unable to manage own medication regimen or stay alone at home because of the inability to respond to a call or visitor.                                                                                                                                                              |
| III  | The patient has symptoms or behaviors that disturb daily living and require care.                                                                                 |                                                                                                                                                                                                                                                                                            |
| IIIa | The conditions in III is mainly present during the daytime.                                                                                                       | Has difficulty or takes extra time for dressing, eating, defecating, or urinating; puts objects into their mouth, picks up and collects objects, is incontinent, makes loud and incoherent screams, carelessly handles fire, engages in unhygienic acts or inappropriate sexual acts, etc. |
| IIIb | The conditions in III is mainly present during the nighttime.                                                                                                     | Same as rank IIIa.                                                                                                                                                                                                                                                                         |
| IV   | The patient frequently has symptoms or behaviors that disturb their daily living, and they always require care.                                                   | Same as rank III.                                                                                                                                                                                                                                                                          |
| M    | The patient has severe mental symptoms, behavioral, and psychological symptoms of dementia, or severe physical disease, and therefore requires special treatment. | Has continued mental symptoms including delirium, delusions, and agitation and its associated problematic behaviors, such as self-mutilation or harm to others.                                                                                                                            |

Ministry of Health, Labor and Welfare. Textbook for expert investigators concerning a certification of needed long-term care, revised edition; Ministry of Health, Labour and Welfare: Tokyo, Japan, 2009. Available online: <https://www.mhlw.go.jp/file/06-Seisakujouhou-12300000-Roukenkyoku/0000077237.pdf>. [in Japanese] (Accessed on 23 March 2019).
